# Supplementary material for: The ultralong cycle life of solid flexible asymmetric supercapacitors based on nickel vanadium sulfide nanospheres
Source: Royal Society of Chemistry journal article supplement (doi:10.1039/d0ce00376j), 2020-01-01
Supplement: d0ce00376j1.pdf [file d0ce00376j1.pdf]

# Ultralong Cycle Life of Solid Flexible Asymmetric Supercapacitors Based on Nickel Vanadium Sulfide Nanospheres

Yuanyuan Li<sup>a</sup>, Xin Chen<sup>a</sup>, Yali Cao<sup>a</sup>, Wanyong Zhou<sup>b</sup>, Hui Chai<sup>a,\*</sup>

<sup>a</sup>Key laboratory of Energy Materials Chemistry, Ministry of Education, Key Laboratory of Advanced Functional Materials, Institute of Applied Chemistry, Xinjiang University, Urumqi 830046, Xinjiang, P. R. China

<sup>b</sup>College of Chemistry & Chemical Engineering, Xinjiang University, Urumqi, Xinjiang, P.R. China

\*Corresponding author: Tel: +86 9918583083; Fax: +86 9918588883; E-mail:

[huichmails@163.com](mailto:huichmails@163.com)

## 1 Experimental Section

All reagents used in the experiment were of analytical grade and used without further purification.

### 1.1 Preparation of reduced graphene oxide(rGO)

Graphene oxide (GO) was obtained via modified Hummers method [1]. Cysteine was used to reduce graphene oxide via a simple hydrothermal method. 6 mg cysteine was dissolved in 30 mL graphene oxide solution (2 mg/mL). Then the mixture were transferred into 50 mL Teflon-lined stainless autoclave and heated to 160°C for 4 h in an oven. The obtained product was washed with ethanol and deionized water several times and freeze-drying for further use. The as-prepared product was marked reduced graphene oxide (rGO).

---

\*Corresponding author: Tel: +86 991 858 3083; Fax: +86 991 858 8883; E-

mail:[huichmails@163.com](mailto:huichmails@163.com)

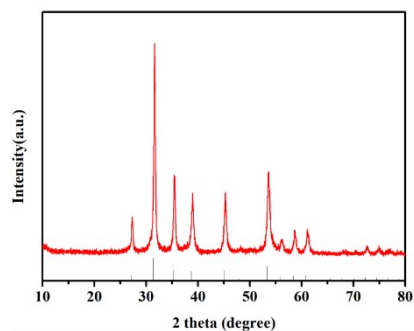

Fig. S1 XRD patterns of products obtained in presence of  $\text{Ni}(\text{NO}_3)_2 \cdot 6\text{H}_2\text{O}$  at  $160\text{ }^\circ\text{C}$   
with 2.0g TEOA

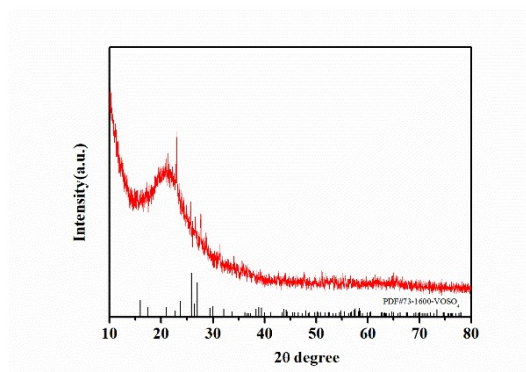

Fig. S2 XRD patterns of products obtained in presence of  $\text{Na}_3\text{VO}_4$  at  $160\text{ }^\circ\text{C}$   
with 2.0g TEOA

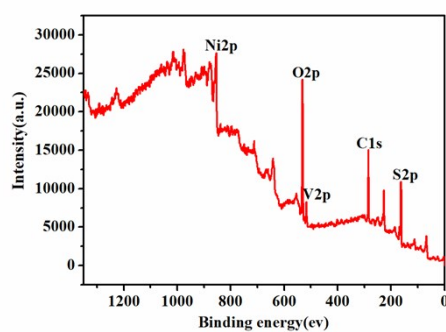

Figure S3. XPS survey spectrum of the Ni-V-S nanospheres

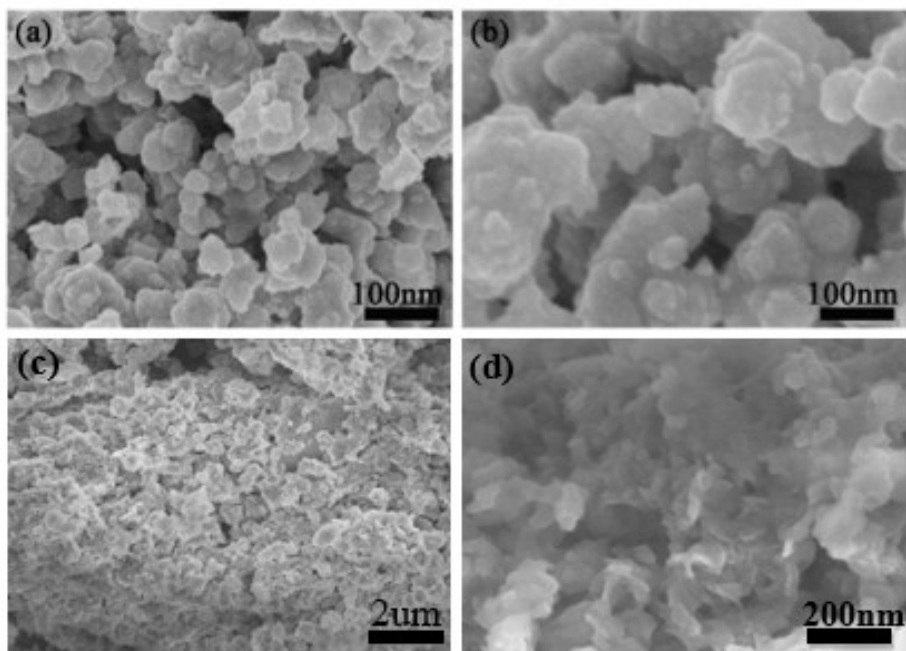

Fig. S4 (a, b) The SEM patterns of NiS<sub>2</sub>, (c, d) The SEM patterns of VOSO<sub>4</sub>

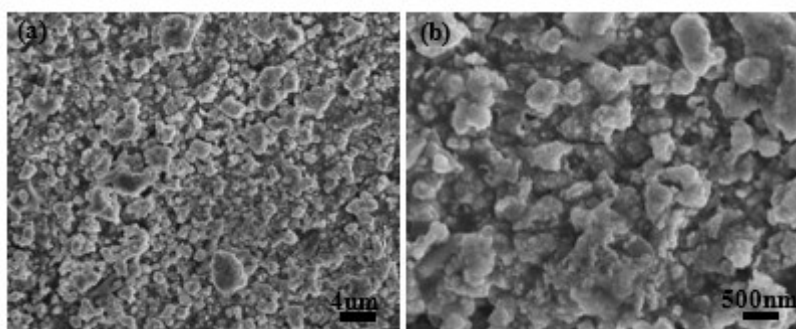

Fig. S5 SEM images without TEOA

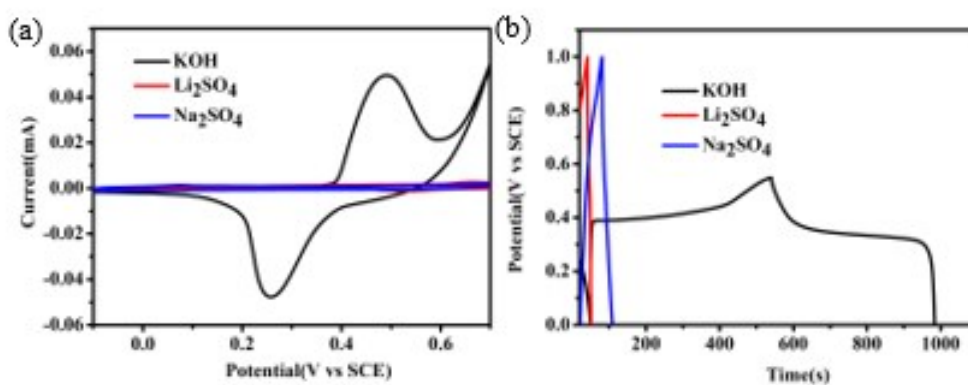

Fig. S6 (a) CV curves in Li<sub>2</sub>SO<sub>4</sub>, Na<sub>2</sub>SO<sub>4</sub> and KOH electrolyte solution, (b) GCD curves in Li<sub>2</sub>SO<sub>4</sub>, Na<sub>2</sub>SO<sub>4</sub> and KOH electrolyte solution.

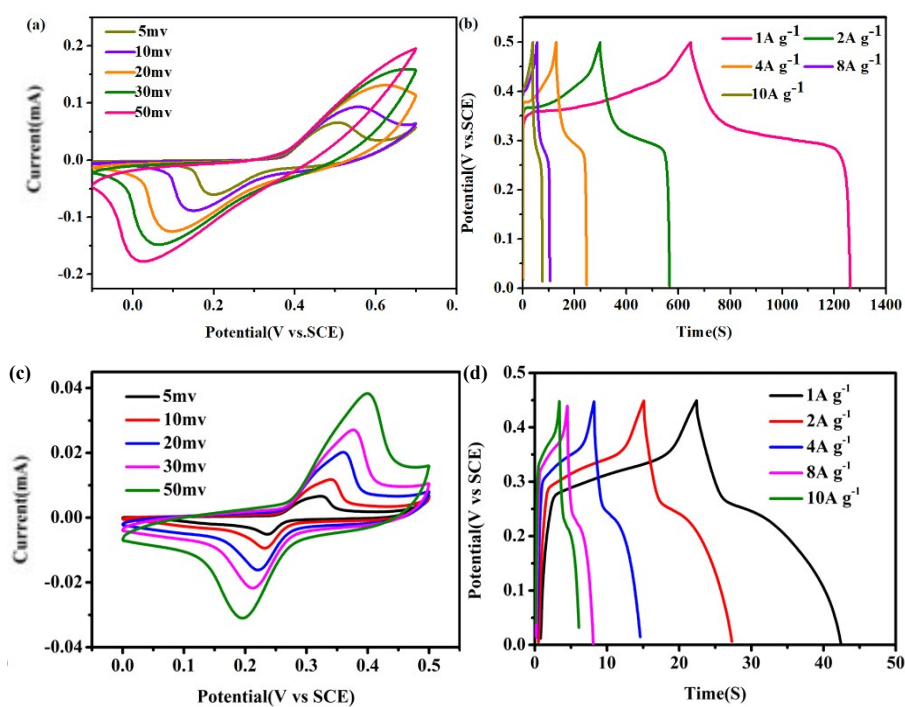

Fig. S7 (a, b) CV curves at various scan rates, and (c,d) GCD curves at various current densities for NiS<sub>2</sub> and VO<sub>2</sub>, respectively

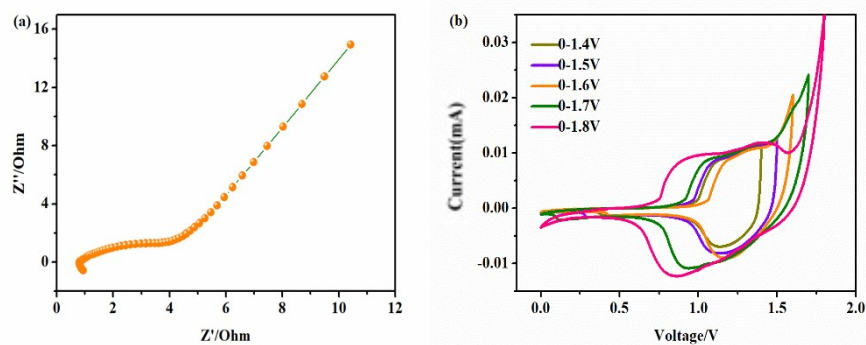

Fig. S8 (a) EIS curves of the samples at the 2.0g TEOA (b) CV curves at a scan rate of 5mV s<sup>-1</sup> in different voltage windows.

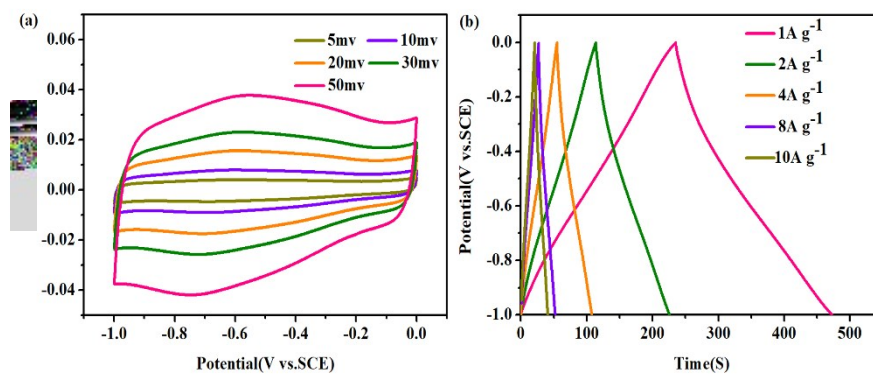

Fig.S9 (a) CV curve of rGO. (b) GCD curve of rGO

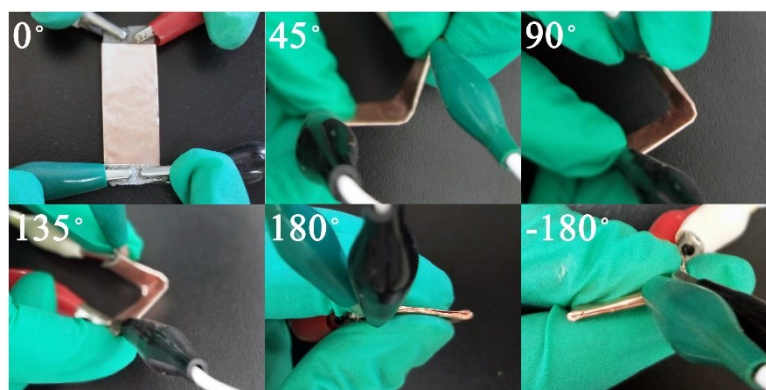

Fig.S10 Digital photos of ASC with solid state electrolyte under different bending angles (0°, 45°, 90°, 135°, 180°, and -180°).

## Reference

- [1] W.S.H. Jr, R.E. Offeman, Preparation of Graphitic Oxide, Journal of the American Chemical Society 1958 **80** 1339.
